1 **Factors that influence-COVID-19 Vaccine Uptake and Hesitancy Among a Population in**  
2 **the West Department of Haiti: Implications for Enhancing Effectiveness of Immunization**  
3 **Programs**

4 *Martine Etienne-Mesubi<sup>1</sup>, Babatunji Oni<sup>1</sup>, Nancy Rachel Labbe-Coq<sup>1</sup>, Marie Colette Alcide-*  
5 *Jean-Pierre<sup>1</sup>, Delva Lamarre<sup>1</sup>, Darwin Dorestan<sup>1</sup>, Marie-Ange Bien-Aime<sup>1</sup>, Venice Dorce<sup>1</sup>, Cory*  
6 *Freivald<sup>1</sup>, Cowan Angell<sup>1</sup>, Yingjie Wang<sup>1</sup>, Jenevieve Opoku<sup>1</sup>, Bryan Shaw<sup>1</sup>, Deus Bazira<sup>1</sup>*

7  
8 <sup>1</sup>Georgetown University Medical Center  
9 Center for Global Health Practice & Impact  
10 Department of Medicine  
11 Washington, DC  
12 United States of America

13

14 **Abstract**

15

16 **Introduction:** The COVID-19 pandemic in Haiti led to increased challenges for a population  
17 concurrently dealing with natural and social disasters, poor quality health care, lack of clean  
18 running water, and inadequate housing. While half a million vaccines for COVID-19 were  
19 donated by the United States to the government of Haiti, less than 5% of the population agreed  
20 to be vaccinated. This resulted in thousands of unused doses that were diverted to other  
21 countries. The purpose of this study was to evaluate population characteristics related to vaccine  
22 uptake in order to inform future interventions to improve COVID-19 vaccine uptake as well as  
23 inform strategies to safeguard against future global health security threats.

24 **Methods:** This was a mixed-methods, cross-sectional study conducted in the West Department  
25 of Haiti within peri-urban communes. Survey participants consisted of adults of this setting  
26 responding to an electronic survey between June – Sept 2022. The survey assessed  
27 demographic information, household characteristics, religious beliefs, past vaccine use, and  
28 current COVID-19 vaccine status. Multivariate regression modeling was conducted to assess

29 predictors of vaccine hesitancy. Qualitative focus group discussions were conducted among  
30 community leaders and health professionals to provide additional, community-level context on  
31 perceptions of the COVID-19 pandemic and vaccines.

32 **Results:** A total of 1,923 respondents completed the survey; of which a majority were male  
33 (52.7%), were between the age of 18-35 (58.5%), had a medical visit with the last year (63.0%)  
34 and received the COVID-19 vaccine (46.1%). Compared to those who had been COVID-19  
35 vaccinated, participants who had not been vaccinated were more likely to be male (57.7% vs  
36 46.8%,  $p<.0001$ ), have classical education (30.5% vs 16.6%,  $p<.001$ ), unemployed (20.3% vs  
37 7.3%,  $p<.0001$ ) and had a medical visit 3 or more years ago (30.2% vs 11.2%,  $p<.0001$ ).  
38 Unvaccinated COVID-19 participants were also more likely to have never received any other  
39 vaccine (36.1% vs 22.5%,  $p<.0001$ ), have a religious leader speak out against the vaccine (20.0%  
40 vs 13.1%,  $p<.0001$ ), not believe in the effectiveness of the vaccine (51.2% vs 9.1%,  $p<.0001$ )  
41 and did not trust the healthcare worker administering the vaccine (35.2% vs 3.8%,  $p<.0001$ ).

42 **Conclusion:** These results show that targeted interventions to religious leaders and health care  
43 workers on how to engage with the community and share clearer messages around the COVID-  
44 19 vaccination may result in increased vaccine uptake. Results also shed light on how activities  
45 surrounding vaccinations can be tailored to meet client needs addressing the misinformation  
46 encountered to achieve greater health impact thereby safeguarding the population against future  
47 global health security threats.

48

## 49 **Introduction**

50

51 While the development and implementation of vaccination programs have been a seminal

52 achievement for public health globally, the perception of vaccines as harmful or unnecessary

53 resulting in a hesitancy to take any specific vaccine, has grown overtime (Cooper, 2018; Dube  
54 2013; Sato, 2018). Within the field, the very definition of vaccine hesitancy has evolved over  
55 time. MacDonald and colleagues defined vaccine hesitancy as a “delay in acceptance or refusal  
56 of vaccination despite availability of vaccination services,” often due to specific regional and  
57 cultural contexts (MacDonald, 2015), while others thought this should be defined as a “process  
58 of decision-making” (Peretti-Watel, 2015). The dynamics of this phenomenon led to the  
59 development of various working groups that targeted vaccine hesitancy and confidence, vaccine  
60 demand, and behavioral and social drivers of vaccinations (NVAC, 2015; Schuster, 2015;  
61 WHO, 2014; WHO, 2019). In 2019, the World Health Organization (WHO) cited vaccine  
62 hesitancy as one of the top ten threats to global health (WHO, 2019). Various vaccinations such  
63 as routine childhood vaccines, HPV, and more recently COVID-19, have improved overall  
64 population health. However, these and other vaccines continue to lag in uptake and acceptance  
65 across many communities globally (Atwell, 2014; Nguyen, 2022).

66  
67 Although vaccine hesitancy did not begin with emergence of COVID-19, it has been  
68 exacerbated by this threat and continues to be an area of great public health concern. A recent  
69 report published by the United Nations Children’s Fund (UNICEF) found that confidence in  
70 vaccines for children is currently lower than prior to the COVID-19 pandemic in many countries  
71 (UNICEF, 2023). There has been a decline in confidence in childhood vaccines of up to 44% in  
72 some countries. This is resulting in a reduction in the protection against preventable diseases  
73 such as measles and poliovirus. The WHO has developed the Immunization Agenda 2030, which  
74 aspires to achieve 90% global coverage for routine childhood vaccinations while also moving  
75 quickly to introduce a new round of immunizations in low-income countries. However, this

76 agenda could be derailed if the factors that contribute to hesitancy, low confidence in vaccine  
77 importance, or transparency are not addressed. The erosion of confidence in health care workers,  
78 misinformation spreading over social media, as well as other social and cultural factors should be  
79 identified and appropriately addressed if we are to meet the goals of, not only vaccinating  
80 populations against COVID-19, but also against other preventable diseases.

81  
82 Haiti has had access to the COVID-19 vaccine since August 2020, however only 3% of the  
83 population has been vaccinated for COVID-19 (CARPHA, 2022). The Haitian health system is  
84 extremely limited and managing COVID-19 has proven to be an enormous strain on the health  
85 care resources. With less than five health institutions in the entire country able to care for  
86 patients with COVID-19, a shortage of personal protective equipment (PPE), and an increase in  
87 rampant misinformation about the disease, the response has been strained. Additionally, the  
88 insecurity challenges that have increased over time have intensified the poor response to health  
89 seeking behaviors. The goal of this study was to investigate COVID-19 vaccine hesitancy and  
90 vaccine acceptance in the West department of Haiti. Findings will support future efforts in  
91 increasing COVID-19 vaccination uptake as well as general childhood and adult immunization  
92 efforts.

## 93 **Methods**

### 94 95 Study Design and Population

96 This was a mixed-methods, cross-sectional study conducted in the West Department of Haiti  
97 within peri-urban communes. Recruitment for this study started on June 6, 2022 and ended on  
98 September 1, 2022. Quantitative data was collected through a survey of adults resident in this

99 setting designed by Georgetown University Center for Global Health Practice and Impact  
100 (CGHPI) Haiti Study team. The survey was administered electronically and was used to assess  
101 COVID-19 vaccine hesitancy, uptake, and associated factors. Focus group discussions (FGDs)  
102 were conducted among community leaders and health professionals to provide qualitative data  
103 on vaccine acceptability and hesitancy at the community level. Verbal consent was obtained  
104 from all participants prior to study inclusion. Participants were provided with a detailed  
105 explanation of the purpose of the study as well as the risks and benefits to study participation.  
106 Participants were given an opportunity to ask questions about the study. Verbal consent was  
107 documented by the research team. A consent form detailing the study details was also provided  
108 to participants for their reference.

109 *Survey Development, Sampling, Data Collection, Analysis*

110 The survey was adapted from the COVID-19 vaccination acceptability study (COVAccS)  
111 (Sherman et al., 2021). Study participants were asked about sociodemographic characteristics  
112 such as age, gender, marital status, level of education, religion, employment status, department  
113 of residence, and number of persons living in their household. Characteristics describing  
114 participants' health and history of illness were also asked such as the last time that they had a  
115 medical consultation, diagnosed with any chronic illnesses, or whether they had ever been  
116 vaccinated against any disease. Knowledge of Covid-19 vaccines was also asked, as well as  
117 vaccine information sources, including whether participants were aware of the different types of  
118 COVID-19 vaccines that were available in Haiti, whether they had been vaccinated against  
119 COVID-19, and reasons why they had or had not been vaccinated. Questions about perceived  
120 vaccine effectiveness and perceived health worker knowledge about vaccines were also  
121 evaluated. The survey also assessed influences of religion and culture on whether one decided

122 for or against getting vaccinated. Similarly, questions about the influence that policy makers or  
123 political leaders have on decisions to get vaccinated or to abstain from vaccinations were also  
124 assessed.

125  
126 Eligibility criteria to participate in the study included being a resident within any commune of  
127 the West Department of Haiti and being 18 years of age or older. Recruitment of participants  
128 was done through administrators of institutions such as churches, voodoo sectors, and health  
129 institutions. This was a convenience sample of participants within these sectors. The total target  
130 sample size required was 1,583 study participants considering a confidence interval of 95% with  
131 a conservative estimate of 50% of Haitians willing to be vaccinated and an expected response  
132 rate of 80%. Community health care workers (CHCWs) were trained over a period of two weeks  
133 and the survey data collection was completed between June 15, 2022 and July 18, 2022.

134 Participants provided their consent prior to administration of the survey. Surveys were developed  
135 on the Qualtrics™ platform and uploaded onto tablets that were used by CHCWs to administer  
136 the surveys to participants. Surveys were available to participants in Creole and French and took  
137 30 minutes on average to complete.

138  
139 Chi-squared tests were used to compare categorical variables and t-tests to compare means  
140 between vaccinated and unvaccinated persons. Univariate logistic regression analyses were  
141 conducted to assess factors associated with vaccine hesitancy. Our study defines vaccine  
142 hesitancy as a delay in acceptance or refusal of vaccination in spite of availability of vaccination  
143 services (Macdonald, 2015). Factors found to be significantly associated with vaccine hesitancy  
144 were included in the multivariate model, adjusting for sociodemographic variables. We present

145 adjusted odds ratios with 95% confidence intervals. SAS v9.2 was used to analyze the survey  
146 data.

147  
148 Qualitative data were collected through 16 FGDs conducted with purposively selected  
149 community and religious leaders and health professionals. FGDs were stratified into those that  
150 had reportedly received at least one dose of a COVID-19 vaccine and those that refused.  
151 Participants discussed their knowledge and perceptions of COVID-19 and vaccines as well as  
152 their reasons for/against getting vaccinated. Discussions involved 8-12 individuals, were  
153 facilitated by a two trained data collectors in Creole and French, and took 45 minutes on average  
154 to complete. FGDs were audio-recorded and translated and transcribed into English. We  
155 employed thematic content analysis using the software MAXQDA 2022 (VERBI Software,  
156 2021) for data analysis.

157  
158  
159

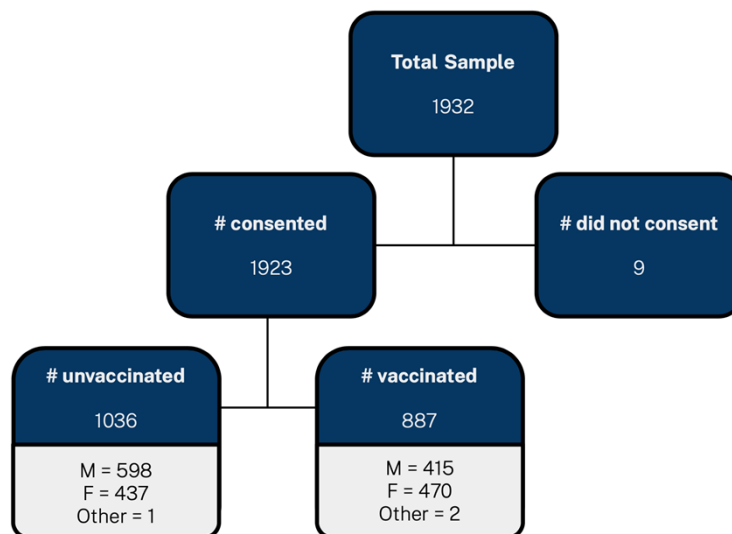

160  
161 *Fig 1. Sampling Schema*

162  
163 *Ethics Statement*

164 This study was approved by the Georgetown University Institutional Review Board, study

165 number STUDY00004690. The study was also approved by the National Committee of  
166 Bioethics in Haiti, Reference number 2122-39. Verbal consent was obtained from all participants  
167 prior to study inclusion.

## 168 **Results**

169  
170 Of the 1,932 individuals approached to participate in this study, a total of 1923 (99.5%)  
171 respondents provided consent and completed the survey. A majority were male (52.7%), were  
172 between the age of 18-35 (58.5%) and were married or in a common-law relationship (43.6%). A  
173 majority of participants (86%) cited a specific religious affiliation, 96.2% reported some level of  
174 education, 65.1% reported some level of employment and 52.3% were living with five or more  
175 people in their household.

176  
177 Compared to those who had been COVID-19 vaccinated, participants who had not been  
178 vaccinated were more likely to be male (57.7% vs 46.8%,  $p<.0001$ ), have classical education  
179 (30.5% vs 16.6%,  $p<.001$ ), unemployed (20.3% vs 7.3%,  $p<.0001$ ) and had a medical visit 3 or  
180 more years ago (30.2% vs 11.2%,  $p<.0001$ ). Unvaccinated participants were also more likely to  
181 be between the ages of 18-25 (32.5% vs 15.8%,  $p<.0001$ ) and were more likely to be single  
182 (57.3% vs 40.1%,  $p<.0001$ ).

183 Within our population, we found four main buckets that contributed to certain facilitators and  
184 barriers to vaccine uptake. These include: health seeking behaviors, knowledge of COVID-19  
185 and sources of information, trust in the healthcare system.

186



## 187 **Health Seeking Behaviors**

188 Health seeking behaviors have been associated with various factors such as health literacy,  
189 worsened health outcomes or long distance to care facilities (Lubetkin, et. al, 2015, Musoke, et.  
190 al, 2014). Our study found that unvaccinated participants were more likely to report not having a  
191 medical visit for 3 or more years (30.2% vs 11.2%,  $p<.0001$ ) and more likely to never have taken  
192 a vaccine previously (36.1% vs 22.5%,  $p<.0001$ ). However, we saw no difference among  
193 participants who reported having comorbidities.

194  
195 About 9.0% of those who were unvaccinated reported distance (9.5% vs. 1.7%,  $p<0.001$ ) and  
196 wait time (9.0% vs. 1.7%,  $p<0.0001$ ) as being a prohibitive factor to getting vaccinated  
197 compared to almost 2% of those where reported receiving the vaccine.

198 Focus group discussions around this theme supported quantitative findings, revealing that many  
199 unvaccinated participants were hesitant to believe COVID-19 existed in Haiti, shared common  
200 misconceptions or misinformation around COVID-19 or the COVID vaccine, and/or experienced  
201 mistrust in government and health officials. In addition, many participants, vaccinated and  
202 unvaccinated, shared concerns over the effectiveness of the COVID vaccine or expressed fear  
203 over negative side effects. These factors supported a majority of participants' health-seeking  
204 behaviors or reasons why they had not been vaccinated. Several participants across varying  
205 groups of vaccinated and unvaccinated participants shared similar remarks around disbelief in  
206 COVID or its existence in Haiti.

207 *“I myself do not believe that it [COVID-19] exists for us Haitians”*

208 Among participants who had been vaccinated, common motivations for seeking a vaccine were  
209 protection of self, as required by work or travel, for incentives such as food or money, and/or in  
210 response to attending a training on COVID-19 and the new vaccine.

### 211 **Knowledge of COVID-19 and Sources of Information**

212 Knowledge of COVID-19 disease and having reliable sources of information may have also  
213 played an important role in vaccine hesitancy within this population. Our findings showed that  
214 unvaccinated participants were less likely to be aware of the COVID-19 vaccine in Haiti (71.3%  
215 vs 19.1%,  $p < .0001$ ), less likely to believe in the effectiveness of the vaccine (8.1% vs 64.4%,  
216  $p < .0001$ ) but more likely to have a religious leader speak out against the vaccine (20.0% vs  
217 13.1%,  $p < .0001$ ). Vaccinated participants were more likely to believe in their source of COVID-  
218 19 information (50.2% vs 20.4%,  $p < .0001$ ). Vaccinated participants also reported that their  
219 leaders were more likely to encourage them to take the vaccine (48.8%) compared to those who  
220 were not vaccinated (37.6%)  $p < .0001$ ).

221 The knowledge of COVID-19 and sources of information among focus group participants in this  
222 study reveal a complex landscape of beliefs and concerns. Notably, the analysis on the focus  
223 group discussions aligns with our quantitative finding that individuals in vaccinated groups tend  
224 to exhibit greater trust in their COVID-19 information sources and beliefs in vaccine  
225 effectiveness. However, while they acknowledge the significance of vaccines in safeguarding the  
226 community, concerns persist regarding vaccine side effects and myths related to the vaccine.  
227 Additionally, there is a prevailing sense of mistrust in both domestic and international  
228 authorities, contributing to vaccine skepticism. This skepticism encompasses worries related to  
229 unknown side effects, vaccine efficacy, suspicions of political agendas, and the spread of

230 misinformation. This emphasizes the need to work on strengthening government credibility as a  
231 go to source for public information. This will enable accurate information dissemination and  
232 equitable vaccine access to combat misinformation and promote vaccinations in Haiti. One  
233 respondent expressed concern about the situation:

234 “ ... we know that we live in a country where the state does not exist - already during the cholera  
235 epidemic, we saw that the health actors and the state’s response is still very very weak, not what  
236 it should be. So my concern is that our state will not react as it should react, then the population  
237 will not be reactive enough to report the damage the disease can cause and the behavior of the  
238 population could favor the disease and spread it even more..”

239

## 240 **Trust in the Healthcare System**

241  
242 Trust in the healthcare system and manufacturing industries were also evaluated among Haitian  
243 residents in relation to vaccine hesitancy. Unvaccinated participants were more likely to distrust  
244 the pharmaceutical industry (65.4% vs 25.0%,  $p<.0001$ ), distrust that the vaccine is good for  
245 their health (47.3% vs 12.7%,  $p<.0001$ ) and more likely to distrust healthcare workers who  
246 administer the vaccines (35.2% vs 3.8%,  $p<0.001$ ).Table 1.

247 These quantitative findings were largely supported by the qualitative results. Focus group  
248 participants shared a range of reasons for their mistrust of the health system, the Haitian  
249 government, and/or the larger global public health agenda. This is evidenced by common  
250 conspiracy theories that surfaced in different focus groups of varying vaccination status. Some  
251 participants mentioned mistrust in healthcare workers to the extent that they would not believe a  
252 COVID-19 positive test result until it had been proven by multiple tests from different locations.

253 Many respondents viewed the Haitian health system as ‘weak’ and expressed skepticism in the  
 254 government’s messaging around COVID-19 and the vaccine. More than half (at least 6/11) of the  
 255 FGDs expressed concern over nefarious motivations of the foreign governments distributing the  
 256 vaccines, believing that the vaccinations were intended to cause harm to its recipients. Fear of  
 257 COVID-19, misinformation, and mistrust seem to go hand-in-hand with participant’s health  
 258 behaviors, causing uncertainty and skepticism towards sources that should be reliable. Health  
 259 system mistrust was expressed in a number of ways from conspiracy theories to complete  
 260 mistrust in the government system as a whole. This quote from one respondent represents the  
 261 deep-seated mistrust expressed across many of FGD participants.

262 *“I myself, if they told me that I have corona, I would say that the doctor is lying. Haitians do not*  
 263 *stand for the [Corona]. Haiti already has its virus. Insecurity, kidnapping, they are our crown*  
 264 *[Corona].”*

265

**Table 1. Trust in the Healthcare System and COVID-19 (N=1923)**

| Variable                                                               |                     | Unvaccinated<br>n=1036 (53.9%) | Vaccinated<br>n=887 (46.1%) | X <sup>2</sup> p-value |
|------------------------------------------------------------------------|---------------------|--------------------------------|-----------------------------|------------------------|
| Believe in the pharmaceutical industries that manufacture the vaccines | Yes                 | 358 (34.6%)                    | 665 (75.0%)                 | <0.0001                |
|                                                                        | No                  | 678 (65.4%)                    | 222 (25.0%)                 |                        |
| Believe that the COVID-19 vaccine is good for my health                | Completely Agree    | 73 (7.0%)                      | 199 (22.4%)                 | <0.0001                |
|                                                                        | Agree               | 290 (28.0%)                    | 565 (63.7%)                 |                        |
|                                                                        | Disagree            | 490 (47.3%)                    | 113 (12.7%)                 |                        |
|                                                                        | Completely Disagree | 183 (17.7%)                    | 10 (1.1%)                   |                        |
| Believe that vaccines                                                  | Completely Agree    | 58 (5.6%)                      | 193 (21.8%)                 |                        |

|                                                           |                     |             |             |         |
|-----------------------------------------------------------|---------------------|-------------|-------------|---------|
| are essential in the fight against COVID-19               | Agree               | 323(31.2%)  | 472(53.2%)  | <0.0001 |
|                                                           | Disagree            | 451(43.5%)  | 195(22.0%)  |         |
|                                                           | Completely Disagree | 204 (19.7%) | 27 (3.0%)   |         |
| Trust the health care workers who administer the vaccines | Yes                 | 278(26.8%)  | 684(77.1%)  | <0.0001 |
|                                                           | No                  | 365 (35.2%) | 34(3.8%)    |         |
|                                                           | Not Sure            | 393 (37.9%) | 169 (19.1%) |         |

266  
 267 After adjusting for gender, age, education and employment status, participants who were  
 268 unvaccinated for COVID were significantly more likely to have never been vaccinated for any  
 269 other disease (aOR: 2.01, 95% CI: 1.32-3.05), follow anti-vaccination advice, (aOR: 2.12, 95%  
 270 CI:1.26-3.55) and significantly more likely to disbelieve in vaccination effectiveness (aOR:  
 271 35.43, 95% CI: 20.73-60.58). (Table 2) Unvaccinated participants were also significantly more  
 272 likely to have distrust for healthcare workers (aOR: 7.42, 95% CI:4.08-12.47) and believe that  
 273 distance to the healthcare facilities was a hinderance to receiving the vaccination (aOR: 6.82,  
 274 95% CI: 2.07-22.95). Table 2.

275  
 276  
 277  
 278  
 279  
 280  
 281  
 282  
 283

**Table 2. Factors Associated with COVID Vaccine Hesitancy**

| Variable |       | OR (95% CI)             | P-value          | AOR (95% CI)†           | P-value      |
|----------|-------|-------------------------|------------------|-------------------------|--------------|
| Age      | 36+   | --                      |                  | --                      |              |
|          | 18-35 | <b>1.64 (1.36-1.96)</b> | <b>&lt;.0001</b> | <b>1.40 (1.01-1.96)</b> | <b>.0462</b> |
| Gender   | Male  | --                      |                  | --                      |              |

|                                                      |        |                            |                  |                            |                  |
|------------------------------------------------------|--------|----------------------------|------------------|----------------------------|------------------|
|                                                      | Female | <b>0.63</b>                | <b>&lt;.0001</b> | 0.89 (0.64-1.23)           | .7705            |
| Ever vaccinated for any disease<br>No vs Yes         | Yes    | --                         |                  | --                         |                  |
|                                                      | No     | <b>2.06 (1.68-2.53)</b>    | <b>&lt;.0001</b> | <b>2.01 (1.32-2.98)</b>    | <b>&lt;.0001</b> |
| Religious leader speaks out<br>against COVID vaccine | No     | --                         |                  | --                         |                  |
|                                                      | Yes    | <b>1.80 (1.31-2.48)</b>    | <b>&lt;.0001</b> | 1.19 (0.75-1.90)           | .4570            |
| Follow anti-vaccination advice                       | No     |                            |                  |                            |                  |
|                                                      | Yes    | <b>1.83 (1.39-2.39)</b>    | <b>&lt;.0001</b> | <b>2.12 (1.26-3.55)</b>    | <b>.0045</b>     |
| Distance to vaccination clinic                       | No     |                            |                  |                            |                  |
|                                                      | Yes    | <b>6.07 (3.49-10.53)</b>   | <b>&lt;.0001</b> | <b>6.82 (2.07-22.95)</b>   | <b>.0016</b>     |
| Wait-time to receive vaccination                     | No     | --                         |                  | --                         |                  |
|                                                      | Yes    | <b>5.73 (3.29-9.96)</b>    | <b>&lt;.0001</b> | 2.43 (0.67-8.85)           | .1784            |
| Believe in vaccination<br>effectiveness No vs Yes    | Yes    | --                         |                  | --                         |                  |
|                                                      | No     | <b>44.48 (32.06-61.70)</b> | <b>&lt;.0001</b> | <b>35.43 (20.73-60.58)</b> | <b>&lt;.0001</b> |
| Trust Healthcare workers No vs<br>Yes                | Yes    | --                         |                  | --                         |                  |
|                                                      | No     | <b>26.41 (18.09-38.55)</b> | <b>&lt;.0001</b> | <b>7.42 (4.08-12.47)</b>   | <b>&lt;.0001</b> |

†Adjusting for Gender, Age, Education, and Employment status

284

## 285 Discussion

286 The impact of COVID-19 was devastating across many countries. This was of particular concern  
 287 for low to middle income countries struggling with poor living conditions, poor sanitation, lack  
 288 of clean running water and overcrowding. Our study aimed to assess facilitators and barriers that  
 289 led to vaccine hesitancy in Haiti which currently has the lowest COVID-19 vaccination rates  
 290 across the Caribbean and Latin America. Left unaddressed, vaccine hesitancy can lead to a  
 291 wider threat to health security jeopardizing past and future immunization gains for other  
 292 preventable diseases. Our study sheds light on reasons why Haitians reported being reluctant to

293 accepting to be vaccinated against COVID-19. Reasons also expand to knowledge and  
294 acceptance of the disease itself as well as institutional and health worker trust in the information  
295 being shared with the population. Vaccine distribution and delivery infrastructure as well as  
296 misinformation were some factors resulting in poor vaccine uptake in many low-income  
297 countries (Watson, et.al, 2022). However, even when countries gain access to vaccines the  
298 element of acceptability and trust are prevalent and must be overcome in order to decrease the  
299 emergence and spread of potentially new variants or other diseases which could have been  
300 curbed through community and population vaccinations.

301  
302 A study released in 2021 found that there was a willingness to take COVID-19 vaccine in several  
303 low- and middle-income countries (Solis Arce, et. al). Since then, several studies focused  
304 primarily on low-income countries have reported a hesitancy to the COVID-19 vaccine as well  
305 as low acceptability to information surrounding COVID-19. Some of these studies found that  
306 factors associated with COVID-19 vaccine hesitancy included: perceived social norms, trust in  
307 vaccines, safety of vaccines (Davis, et. al, 2022), rapid development of vaccines, long term  
308 safety (Chukwuocha, et al, 2022), and/or distrust in pharmaceutical industry, antivaccine  
309 messages on social media (Dinga, et. al., 2021;Wouters et.,al, 2021).

310  
311 Our study conducted in the northwest department of Haiti revealed similar outcomes to other  
312 studies that found that indicators such as age, gender, marital status, religion, employment status  
313 and frequency of health appointments were not shown to be predictors of receiving a COVID-19  
314 vaccine. While our data showed that those who were not vaccinated for COVID-19 were more  
315 likely to be male (57.7%), single (57.3%), more likely to be unemployed (20.3%), hadn't been to

316 a medical visit in over three years (30.2%) and were likely to be less than 45 years old, when  
317 included in the adjusted model these indicators were not predictive of receiving a vaccine for  
318 Covid-19.

319  
320 Our study also showed a high distrust of the healthcare workers (aOR: 7.42) and government.  
321 While Solis Arce, et. al. found that many study participants trusted in their healthcare workers  
322 and found that targeted programmatic use of healthcare workers could be used to encourage  
323 vaccination, our study found that a high distrust in healthcare workers was also connected to a  
324 distrust in government. During the implementation of our study, Haiti was experiencing political  
325 unrest coupled with a disbelief in what the government had been sharing about Covid-19 and  
326 prevention messages. This could explain the vast amount of distrust in care providers and  
327 government officials.

328  
329 These findings have important implications towards programmatic rollout of mass vaccination  
330 within this population. Haiti has specific structural and political challenges that should be  
331 highlighted and our findings speak to where we should target models for solutions. For example,  
332 participants have reported low trust in healthcare workers. While our focus group discussions  
333 uncovered some reasons for distrust in healthcare workers, identifying the root of this distrust  
334 through focus group discussions for clients as well as healthcare workers would help understand  
335 the reasons behind the distrust and co-developing solutions to address the distrust. Improving  
336 patient-provider relationships, using expert patients, engaging with the community and civil  
337 society organizations and co-developing strategies with healthcare consumers allowing clients to



338 have a stake in how their care is delivered are several opportunities to address the mistrust in  
339 healthcare providers.

340  
341 There are several strategies that could be implemented to address the challenges that serve as  
342 hindrances to vaccination among this population. For example, Georgetown University with  
343 funding from the CDC Foundation implemented targeted interventions to enhance Covid-19  
344 vaccination among the public. Working through civil society organizations, religious institutions,  
345 and community health care workers the team focused on increasing Covid-19 vaccination  
346 awareness and uptake. To address the issue of access the team supported the increase in  
347 community vaccination points working with departmental health directorates to scale up  
348 vaccinations. Further research has been focused on identifying population segments more likely  
349 to be hesitant towards vaccination with potential to move beliefs and behaviors toward vaccine  
350 confidence and uptake (Improving Vaccine Uptake, 2022). Further research to be explored could  
351 focus on a longitudinal study that follows these implementations over a period of time to assess  
352 healthcare consumer behaviors particularly around vaccinations and health seeking behaviors. In  
353 an effort to curb this “pandemic of mistrust” that is being observed across many countries, a  
354 proposed longitudinal study to review patterns of care and using targeted data to impact  
355 outcomes could prevent these identified challenges that may arise again during a future  
356 pandemic.

357

## 358 **Limitations**

359 Although this study provided insight into causes of vaccine hesitancy, it was subject to a few  
360 limitations. First, it was limited to only those who were in the Western Department of Haiti

361 between June- July 2021, so these results may not be generalizable to all Haitian residents.  
362 Approximately 1.2% of Haitian residents living in the Western department had been vaccinated  
363 by Moderna (July to November 2021) and 3% of residents had been vaccinated overall.  
364 (UEP/MSPP data (DHIS 2.0). Secondly, this was a cross-sectional study where survey responses  
365 were obtained through self-administered online questionnaires, therefore participants' responses  
366 may have been biased. Despite these limitations, our assessment of vaccine uptake is useful for  
367 informing government and clinical entities to develop strategies to address future pandemics.

368

## 369 **Conclusion**

370  
371 Our study has identified concerns of vaccine safety, trust in healthcare providers and  
372 misinformation as key contributors to vaccine hesitancy among this population.  
373 Future pandemic preparedness begins with addressing these factors and ensuring that the  
374 community and the healthcare workers are an integral part of this preparedness. Based on our  
375 findings, vaccine hesitancy can be minimized by working closely with community organizations  
376 and healthcare workers in order to provide accurate and evidence-based information on vaccines,  
377 their intended and unintended consequences. Transparency is important in ensuring information  
378 is shared in a trustworthy manner. Other studies have also suggested that strategies focused on  
379 providing basic messages and education on vaccines and how they work could be influential in  
380 shedding myths and poor perceptions of vaccine development and use (Burger, et. al, 2022;  
381 Jensen, et.al, 2022).

382

383 Our study findings have important implications for current and future epidemics and pandemics  
384 for Haiti's population. With a population of over 11 million people, as of November 2022, Haiti  
385 recorded only 34,000 cases with approximately 860 deaths. Although the infection rate of Covid-  
386 19 in Haiti has been low, its Covid-19 vaccination rate is the lowest across Latin American and  
387 Caribbean countries. While we are beginning to see the global mortality curve trend downwards  
388 for Covid-19, countries with low vaccination against this virus may be at greater risk of being  
389 able to control this pandemic should it rise again. More importantly ensuring that what  
390 populations believe, how they feel and their reaction to pandemics and vaccines are a part of the  
391 strategies used to impact and influence uptake and acceptance must be front and center when  
392 safeguarding against future global health security threats. Future research is needed to examine  
393 reasons for the low infection rate in Haiti, the relationship between this low rate of infection for  
394 Covid-19 and vaccination uptake as well as the population's thoughts on future global health  
395 security threats.

396

## 397 **Acknowledgements**

398 This manuscript is based on consultations and discussions with health care workers, community  
399 members and leaders in the community as well as technical experts and partners in support of  
400 equitable, accessible and inclusive health care. We sought and received input from the ministry  
401 of health as well as the head of the health department in the West department of Haiti. We thank  
402 the community leaders and community participants who gave voice to the issues surrounding  
403 vaccine hesitancy.

## 405 **References**

- 406
- 407 1. Atwell, 2014;
- 408 2. Burger MN, Mayer M, Steimanis I. Repeated information of benefits reduces COVID-19
- 409 vaccination hesitancy: Experimental evidence from Germany. PLoS One. 2022 Jun
- 410 28;17(6):e0270666. doi: 10.1371/journal.pone.0270666. PMID: 35763537; PMCID:
- 411 PMC9239477.
- 412 3. Chukwuocha UM, Emerole CO, Iwuoha GN, Dozie UW, Njoku PU, Akanazu CO, et.al.,
- 413 Stakeholders' hopes and concerns about the COVID-19 vaccines in Southeastern Nigeria:
- 414 a qualitative study. BMC Public Health. 2022 Feb 16;22(1):330. doi: 10.1186/s12889-
- 415 022-12754-4. PMID: 35172789; PMCID: PMC8848682.
- 416 4. Cooper S, Schmidt BM, Sambala EZ, Swartz A, Colvin CJ, Leon N, et.al. Factors that
- 417 influence parents' and informal caregivers' acceptance of routine childhood vaccination: a
- 418 qualitative evidence synthesis. Cochrane Database Syst Rev. 2019 Feb
- 419 18;2019(2):CD013265. doi: 10.1002/14651858.CD013265. PMCID: PMC6378923.
- 420 5. COVID-19 Situation Report No. 254 November 8, 2022. (2022). CARPHA. Available
- 421 from [https://carpha.org/What-We-Do/Public-Health/Novel-Coronavirus/CARPHA-](https://carpha.org/What-We-Do/Public-Health/Novel-Coronavirus/CARPHA-Situation-Reports-for-COVID-19)
- 422 [Situation-Reports-for-COVID-19](https://carpha.org/What-We-Do/Public-Health/Novel-Coronavirus/CARPHA-Situation-Reports-for-COVID-19)
- 423 6. COVID-19: Increasing Vaccination Coverage in Haiti through community outreach.
- 424 (2022, September). Pan American Health Organization. Available from
- 425 [https://www.paho.org/en/stories/covid-19-increasing-vaccination-coverage-haiti-through-](https://www.paho.org/en/stories/covid-19-increasing-vaccination-coverage-haiti-through-community-outreach)
- 426 [community-outreach](https://www.paho.org/en/stories/covid-19-increasing-vaccination-coverage-haiti-through-community-outreach)

- 427 7. Davis TP Jr, Yimam AK, Kalam MA, Tolossa AD, Kanwagi R, Bauler S, et.al,  
428 Behavioural Determinants of COVID-19-Vaccine Acceptance in Rural Areas of Six  
429 Lower- and Middle-Income Countries. *Vaccines* (Basel). 2022 Jan 29;10(2):214. doi:  
430 10.3390/vaccines10020214. PMID: 35214672; PMCID: PMC8875839.
- 431 8. Dubé E, Laberge C, Guay M, Bramadat P, Roy R, Bettinger J. Vaccine hesitancy: an  
432 overview. *Hum Vaccin Immunother*. 2013 Aug;9(8):1763-73. doi: 10.4161/hv.24657.  
433 Epub 2013 Apr 12. PMID: 23584253; PMCID: PMC3906279.
- 434 9. Dinga JN, Sinda LK, Titanji VPK. Assessment of Vaccine Hesitancy to a COVID-19  
435 Vaccine in Cameroonian Adults and Its Global Implication. *Vaccines* (Basel). 2021 Feb  
436 19;9(2):175. doi: 10.3390/vaccines9020175. PMID: 33669659; PMCID: PMC7922050.
- 437 10. Haiti – COVID-19: Flash Update No 2 As of 31 March 2020 (18:00 Haiti time). (2020).  
438 United Nations Office for the Coordination of Humanitarian Affairs (OCHA). Available  
439 from [https://reliefweb.int/report/haiti/haiti-covid-19-flash-update-no-2-31-march-2020-  
440 1800-haiti-time](https://reliefweb.int/report/haiti/haiti-covid-19-flash-update-no-2-31-march-2020-1800-haiti-time)
- 441 11. Jensen UT, Ayers S, Koskan AM. Video-based messages to reduce COVID-19 vaccine  
442 hesitancy and nudge vaccination intentions. *PLoS One*. 2022 Apr 6;17(4):e0265736. doi:  
443 10.1371/journal.pone.0265736. PMID: 35385505; PMCID: PMC8985948.
- 444 12. Lubetkin EI, Zabor EC, Isaac K, Brennessel D, Kemeny MM, Hay JL. Health literacy,  
445 information seeking, and trust in information in Haitians. *Am J Health Behav*. 2015  
446 May;39(3):441-50. doi: 10.5993/AJHB.39.3.16. PMID: 25741688; PMCID:  
447 PMC4496799.

- 448 13. MacDonald NE; SAGE Working Group on Vaccine Hesitancy. Vaccine hesitancy:  
449 Definition, scope and determinants. *Vaccine*. 2015 Aug 14;33(34):4161-4. doi:  
450 10.1016/j.vaccine.2015.04.036. Epub 2015 Apr 17. PMID: 25896383.
- 451 14. Maharaj SB, Dookeeram D, Franco DY. The Nikki Minaj Effect: The impact of social  
452 media disinformation on vaccine hesitancy in the Caribbean. *J Glob Health*. 2021 Nov  
453 13;11:03121. doi: 10.7189/jogh.11.03121. PMID: 34804512; PMCID: PMC8590827.
- 454 15. Musoke D, Boynton P, Butler C, Musoke MB. Health seeking behaviour and challenges  
455 in utilising health facilities in Wakiso district, Uganda. *Afr Health Sci*. 2014  
456 Dec;14(4):1046-55. doi: 10.4314/ahs.v14i4.36. PMID: 25834516; PMCID:  
457 PMC4370086.
- 458 16. Nguyen LH, Joshi AD, Drew DA, Merino J, Ma W, Lo CH, et al, COPE Consortium.  
459 Self-reported COVID-19 vaccine hesitancy and uptake among participants from different  
460 racial and ethnic groups in the United States and United Kingdom. *Nat Commun*. 2022  
461 Feb 1;13(1):636. doi: 10.1038/s41467-022-28200-3. Erratum in: *Nat Commun*. 2022 Mar  
462 25;13(1):1715. PMID: 35105869; PMCID: PMC8807721.
- 463 17. Peretti-Watel P, Larson HJ, Ward JK, Schulz WS, Verger P. Vaccine hesitancy:  
464 clarifying a theoretical framework for an ambiguous notion. *PLoS Curr*. 2015 Feb  
465 25;7:ecurrents.outbreaks.6844c80ff9f5b273f34c91f71b7fc289. doi:  
466 10.1371/currents.outbreaks.6844c80ff9f5b273f34c91f71b7fc289. PMID: 25789201;  
467 PMCID: PMC4353679.
- 468 18. Sato APS. What is the importance of vaccine hesitancy in the drop of vaccination  
469 coverage in Brazil? *Rev Saude Publica*. 2018 Nov 29;52:96. doi: 10.11606/S1518-  
470 8787.2018052001199. PMID: 30517523; PMCID: PMC6284490.

- 471 19. Sharma O, Sultan AA, Ding H, Triggler CR. A Review of the Progress and Challenges of  
472 Developing a Vaccine for COVID-19. *Front Immunol.* 2020 Oct 14;11:585354. doi:  
473 10.3389/fimmu.2020.585354. PMID: 33163000; PMCID: PMC7591699.
- 474 20. Sherman SM, Smith LE, Sim J, Amlôt R, Cutts M, Dasch H, Rubin GJ, Sevdalis N.  
475 COVID-19 vaccination intention in the UK: results from the COVID-19 vaccination  
476 acceptability study (CoVAccS), a nationally representative cross-sectional survey. *Hum*  
477 *Vaccin Immunother.* 2021 Jun 3;17(6):1612-1621. doi:  
478 10.1080/21645515.2020.1846397. Epub 2020 Nov 26. PMID: 33242386; PMCID:  
479 PMC8115754.
- 480 21. Solís Arce JS, Warren SS, Meriggi NF, Scacco A, McMurry N, Voors M, Syunyaev G,  
481 et.al. COVID-19 vaccine acceptance and hesitancy in low- and middle-income countries.  
482 *Nat Med.* 2021 Aug;27(8):1385-1394. doi: 10.1038/s41591-021-01454-y. Epub 2021 Jul  
483 16. PMID: 34272499; PMCID: PMC8363502.
- 484 22. World Health Organization. Ten threats to global health in 2019. (2019). World Health  
485 Organization. Retrieved November 11, 2022, from [https://www.who.int/news-](https://www.who.int/news-room/spotlight/ten-threats-to-global-health-in-2019)  
486 [room/spotlight/ten-threats-to-global-health-in-2019](https://www.who.int/news-room/spotlight/ten-threats-to-global-health-in-2019)
- 487 23. Tohme RA, Francois J, Cavallaro KF, Paluku G, Yalcouye I, Jackson E, et.al. Expansion  
488 of Vaccination Services and Strengthening Vaccine-Preventable Diseases Surveillance in  
489 Haiti, 2010-2016. *Am J Trop Med Hyg.* 2017 Oct;97(4\_Suppl):28-36. doi:  
490 10.4269/ajtmh.16-0802. PMID: 29064356; PMCID: PMC5676636.
- 491 24. Wang CW, de Jong EP, Faure JA, Ellington JL, Chen CS, Chan CC. A matter of trust: a  
492 qualitative comparison of the determinants of COVID-19 vaccine hesitancy in Taiwan,  
493 the United States, the Netherlands, and Haiti. *Hum Vaccin Immunother.* 2022 Nov

- 494 30;18(5):2050121. doi: 10.1080/21645515.2022.2050121. Epub 2022 Mar 29. PMID:  
495 35349382; PMCID: PMC9225662.
- 496 25. Watson OJ, Barnsley G, Toor J, Hogan AB, Winskill P, Ghani AC. Global impact of the  
497 first year of COVID-19 vaccination: a mathematical modelling study. *Lancet Infect Dis.*  
498 2022 Sep;22(9):1293-1302. doi: 10.1016/S1473-3099(22)00320-6. Epub 2022 Jun 23.  
499 Erratum in: *Lancet Infect Dis.* 2023 Oct;23(10):e400. PMID: 35753318; PMCID:  
500 PMC9225255.
- 501 26. Wouters OJ, Shadlen KC, Salcher-Konrad M, Pollard AJ, Larson HJ, Teerawattananon  
502 Y, Jit M. Challenges in ensuring global access to COVID-19 vaccines: production,  
503 affordability, allocation, and deployment. *Lancet.* 2021 Mar 13;397(10278):1023-1034.  
504 doi: 10.1016/S0140-6736(21)00306-8. Epub 2021 Feb 12. PMID: 33587887; PMCID:  
505 PMC7906643.



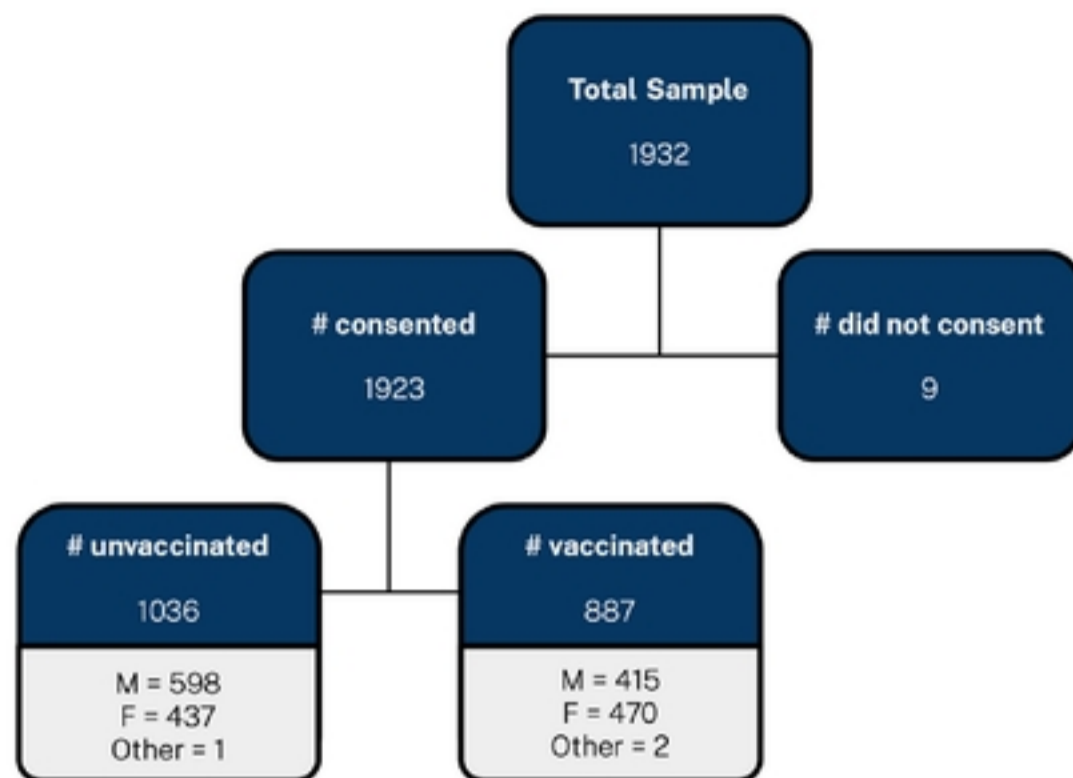

**Fig 1. Sampling Schema**

medRxiv preprint doi: <https://doi.org/10.1101/2024.01.10.24301096>; this version posted January 11, 2024. The copyright holder for this preprint (which was not certified by peer review) is the author/funder, who has granted medRxiv a license to display the preprint in perpetuity. It is made available under a [CC-BY 4.0 International license](https://creativecommons.org/licenses/by/4.0/).
